# Supplementary material for: Hypotension, lipodystrophy, and insulin resistance in generalized PPARγ-deficient mice rescued from embryonic lethality
Source: JCI journal article supplement (doi:10.1172/jci28859), 2007-02-16
Supplement: sd1 [file 1]

## **Results**

### **Normal morphology and unchanged macrophage marker in MORE-PGKO aortas**

Aortas from MORE-PGKO mice did not show significant morphological changes compared to LC (Online Figure I A). Inflammation has been considered as an important factor in blood pressure regulation and PPAR- $\gamma$  is associated with both inflammation and blood pressure regulation (1). We stained aortas with antibodies recognizing macrophage markers. The results showed that F4/80 staining was entirely absent in aortas of both LC and MORE-PGKO mice while the spleen from LC mice served as a positive control with macrophage stained in reddish brown (Online Figure I B). Comparable results were observed using the BM-8 antibody (data not shown) that detects a similar but non-identical macrophage population. Staining with two additional antibodies that detect macrophage, Mac3 and EH-HR3, did not reveal differences between MORE-PGKO and LC aortas either (data not shown). Further, F4/80 protein and mRNA expression levels were not changed in MORE-PGKO aortas compared with LC mice (Online Figure I C~E).

## **Methods**

### **Histologic analysis**

For immunohistochemical staining, sections were incubated at 58°C for one hour, deparaffinized and incubated in antigen retrieval solution (Dako) at 100°C for 14 min. Sections were blocked sequentially with serum, avidin and biotin solutions followed by incubation with primary antibodies against F4/80 (8.33 µg/ml, Bachem), BM-8 (5 µg/ml, Bachem), Mac3 (0.3 µg/ml, BD-Pharmingen), or EH-HR3 (10 µg/ml, Bachem) at 4°C overnight. Staining was visualized using streptavidin-peroxidase and DAB and the sections were counterstained with methyl green/alcian blue. Digital images were obtained using an Olympus BX51 microscope (Olympus America Inc.).

### **Gene expression analysis**

F4/80 gene was assayed using reverse transcription quantitative PCR (RT-QPCR) as described (2). All primer-probe sets were purchased from Applied Biosystems.

### **Western blot analysis**

Total protein was isolated from aortas, subjected to electrophoresis, and transferred to PVDF membranes as described before (3, 4). Membranes were incubated with primary antibodies recognizing F4/80 (Abcam Inc.), and Actin (Santa Cruz Biotechnology Inc.). The membranes were then incubated in secondary antisera conjugated with horseradish peroxidase and detected as before (4).

## **Statistics**

Mean  $\pm$  standard error (SE) values were analyzed using Prism (GraphPad Software Inc.). Statistical comparisons between groups were performed by Student's t test. Groups were considered significantly different if P values were  $\leq 0.05$ .

## References

1. Pakala, R., Kuchulakanti, P., Rha, S.W., Cheneau, E., Baffour, R., and Waksman, R. 2004. Peroxisome proliferator-activated receptor gamma: its role in metabolic syndrome. *Cardiovasc Radiat Med* 5:97-103.
2. Schoenfeld, J.R., Vasser, M., Jhurani, P., Ng, P., Hunter, J.J., Ross, J., Jr., Chien, K.R., and Lowe, D.G. 1998. Distinct molecular phenotypes in murine cardiac muscle development, growth, and hypertrophy. *J Mol Cell Cardiol* 30:2269-2280.
3. Duan, S.Z., Ivashchenko, C.Y., Russell, M.W., Milstone, D.S., and Mortensen, R.M. 2005. Cardiomyocyte-specific knockout and agonist of peroxisome proliferator-activated receptor-gamma both induce cardiac hypertrophy in mice. *Circ Res* 97:372-379.
4. Sowell, M.O., Ye, C., Ricupero, D.A., Hansen, S., Quinn, S.J., Vassilev, P.M., and Mortensen, R.M. 1997. Targeted inactivation of  $\alpha 2$  or  $\alpha 3$  disrupts activation of the cardiac muscarinic  $K^+$  channel,  $IK_{ACh}$ , in intact cells. *Proc Natl Acad Sci U S A* 94:7921-7926.

## Figure legends

**Online Figure I. Normal morphology and unchanged macrophage marker in MORE-PGKO aortas.** **A.** Representative H&E histochemistry of aortas from male LC and MORE-PGKO mice. LC: littermate control; KO: MORE-PGKO. The bars indicate 20  $\mu$ m. **B.** Representative immunohistochemical staining of F4/80 (a macrophage marker) in male mice showing negative results in aortas. Spleen was used as a positive control with reddish brown staining of macrophages. The bars indicate 20  $\mu$ m. **C.** Representative Western blots of F4/80 in aortas from male LC and MORE-PGKO mice. Actin was used as a loading control. **D.** Quantification of F4/80 over Actin.  $n = 4$  for each group. NS: not significant. **E.** RT-QPCR result of F4/80 expression in male LC and MORE-PGKO aortas.  $\beta$ -actin was used as an endogenous control.  $n = 4$  for each group. NS: not significant. The results from female mice were similar for A~E.

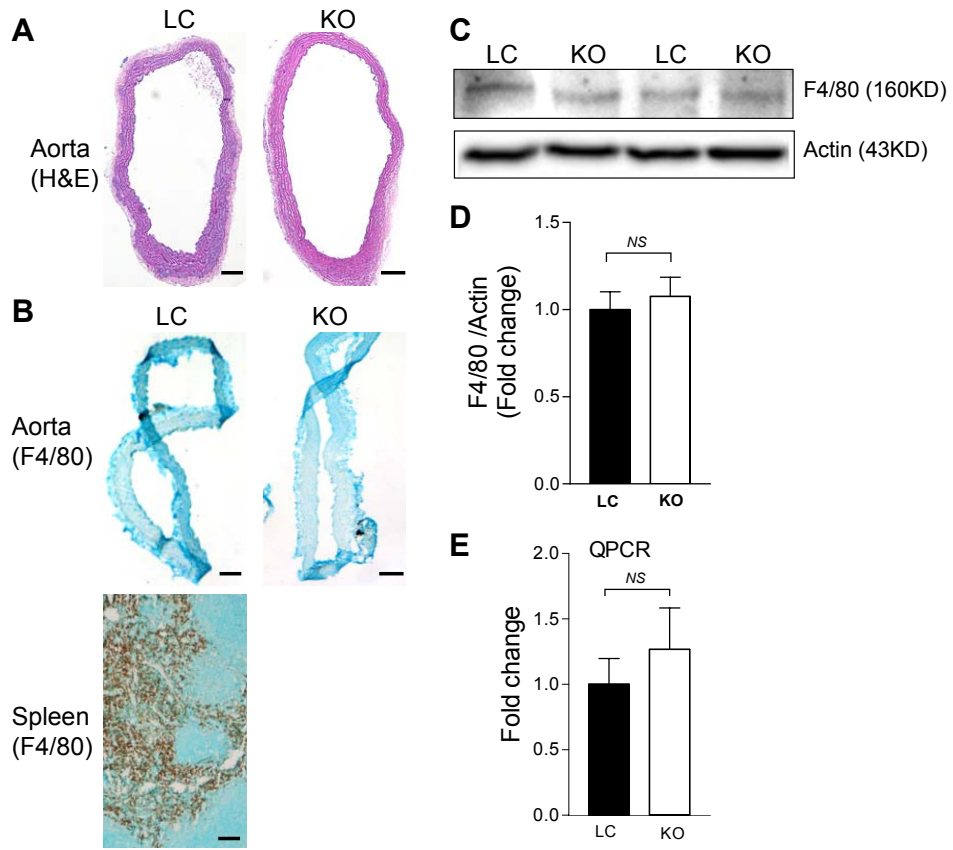

Online Figure I
